# Supplementary material
Source: PubMed Central journal article supplement (PMC3509256)

256 **Figure 2.** Adjusted relative risks of heart failure according to the highest vs. lowest category of  
257 fish intake (Panel A) and EPA and DHA (Panel B).

258 CI denotes confidence interval; HF: heart failure; the size of each square is proportional to the  
259 study's weight (inverse of variance  $-IV$ )

260

261 **Figure 3.** Funnel plot assessing publication bias

262

263 **Figure 4.** Dose-response association of fish intake (Panel A) and dietary EPA+DHA with the  
264 risk of heart failure using random effects GLST analysis.

265 Pooled relative risks (solid black lines) and 95% confidence intervals (dashed lines) at each  
266 quantity of intake are reported. Gray lines connect study-specific relative risk according to fish  
267 or EPA/DHA levels. Vertical axis is on a log scale represents relative risk. The median intake in  
268 the lowest category of fish (0 g/d) and EPA+DHA (14 mg/d) were used as reference groups to  
269 estimate the pooled relative risks of the higher levels.

270 **Supplemental Figure 1.** Dose-response of EPA/DHA on the incidence of heart failure using  
271 spline regression

272

273

274

## Supplemental Figure 1.

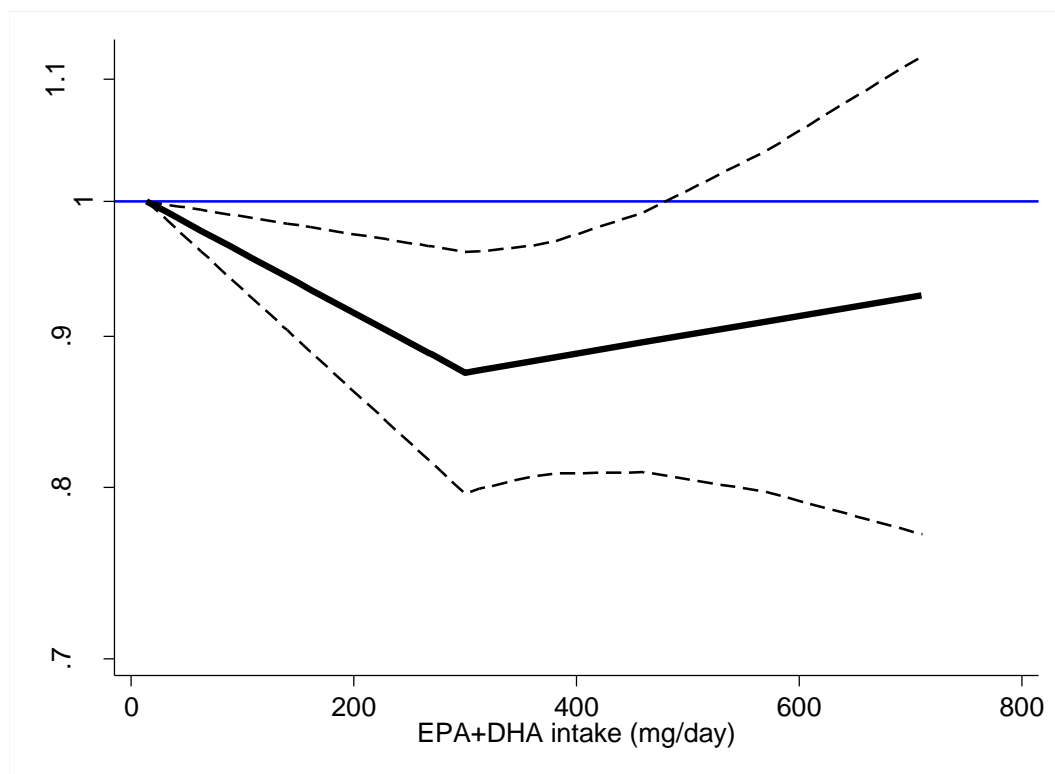

Supplement: NIHMS379202-supplement-01.pdf [file NIHMS379202-supplement-01.pdf]
